# Supplementary material for: Concomitant polymorphs: an alternative to modulate the oxygen evolution performance of mononuclear nickel complexes
Source: Royal Society of Chemistry journal article supplement (doi:10.1039/d1qi00079a), 2021-01-01
Supplement: d1qi00079a1.pdf [file d1qi00079a1.pdf]

# Supporting Information

## Concomitant Polymorphs: An Alternative to Modulate Oxygen

## Evolution Reaction Performance of Mononuclear Nickel Complex

Chen Hu,<sup>1</sup> Qing-qing Huang,<sup>1</sup> Hai-Bing Xu,<sup>\*1,2</sup> Yuexing Zhang,<sup>1</sup> Xu Peng,<sup>1</sup> and

Ming-Hua Zeng<sup>\*1,3</sup>

1 Ministry-of-Education Key Laboratory for the Synthesis and Application of Organic Functional Molecules, Hubei Collaborative Innovation Center for Advanced Organic Chemical Materials, College of Chemistry and Chemical Engineering, Hu-bei University, Wuhan 430062, China. Corresponding Author.

2 State Key Laboratory of Structural Chemistry, Fujian Institute of Research on the Structure of Matter, Chinese Academy of Sciences, Fuzhou, Fujian 350002 (China).

3 Department of Chemistry and Pharmaceutical Sciences, Guangxi Normal University, Key laboratory for the Chemistry and Molecular Engineering of Medicinal Resources, Guilin, 541001, P.R. China.

**E-mail:** [xhb@hubu.edu.cn](mailto:xhb@hubu.edu.cn); [zmf@hubu.edu.cn](mailto:zmf@hubu.edu.cn)

## Contents

|                   |                                                                                                                                                                                                                                                                                                                                                                                                                                         |
|-------------------|-----------------------------------------------------------------------------------------------------------------------------------------------------------------------------------------------------------------------------------------------------------------------------------------------------------------------------------------------------------------------------------------------------------------------------------------|
| <b>Table S1</b>   | Strategy of transition metal complexes as electrocatalysts for OER.                                                                                                                                                                                                                                                                                                                                                                     |
| <b>Table S2</b>   | DFT calculation on the coordinating OH <sup>-</sup> mode of <b>NiL<sub>2</sub>-R</b> and <b>NiL<sub>2</sub>-G</b> .                                                                                                                                                                                                                                                                                                                     |
| <b>Table S3</b>   | Gibbs free energy of <b>NiL<sub>2</sub>-R</b> and <b>NiL<sub>2</sub>-G</b> on different steps of OER under U=0V and U=1.0 V.                                                                                                                                                                                                                                                                                                            |
| <b>Figure S1</b>  | Gibbs free energy level diagram of different steps of OER on <b>NiL<sub>2</sub>-R</b> .                                                                                                                                                                                                                                                                                                                                                 |
| <b>Figure S2</b>  | Gibbs free energy level diagram of different steps of OER on <b>NiL<sub>2</sub>-G</b> .                                                                                                                                                                                                                                                                                                                                                 |
| <b>Figure S3</b>  | Half CVs of (a) <b>NiL<sub>2</sub>-G</b> and (b) <b>NiL<sub>2</sub>-R</b> electrodes in aqueous solutions with different pH values (the scan rate is 10mV/s). And the dependent potentials of (c) <b>NiL<sub>2</sub>-G</b> and (d) <b>NiL<sub>2</sub>-R</b> on pH values.                                                                                                                                                               |
| <b>Figure S4</b>  | DSC curves (Normalized) of <b>NiL<sub>2</sub>-R</b> than that of <b>NiL<sub>2</sub>-G</b> .                                                                                                                                                                                                                                                                                                                                             |
| <b>Figure S5</b>  | CVs for <b>NiL<sub>2</sub>-G</b> and <b>NiL<sub>2</sub>-R</b> treated at 140 °C for 2 hours.                                                                                                                                                                                                                                                                                                                                            |
| <b>Figure S6</b>  | CVs were measured in the non-faradaic region of 0.10–0.20 V vs. Ag/AgCl with different scan rates, varying from 20 mV s <sup>-1</sup> to 120 mV s <sup>-1</sup> .                                                                                                                                                                                                                                                                       |
| <b>Figure S7</b>  | 85% IR-corrected polarization LSV curves in 1.0 M KOH at a scan rate of 10 mV/s for <b>CB@NiL<sub>2</sub>-G</b> and <b>CB@NiL<sub>2</sub>-R</b> .                                                                                                                                                                                                                                                                                       |
| <b>Table S3</b>   | Comparison of the parameters in our work with other reported examples.                                                                                                                                                                                                                                                                                                                                                                  |
| <b>Figure S8</b>  | <b>NiL<sub>2</sub>-R</b> soaked in KOH solution for 10 hours.                                                                                                                                                                                                                                                                                                                                                                           |
| <b>Figure S9</b>  | UV-vis absorption spectra along with the time for <b>NiL<sub>2</sub></b> (1mg) dissolved in a mixture solvent of DMF (1mL) and KOH solution (9mL).                                                                                                                                                                                                                                                                                      |
| <b>Figure S10</b> | Stability check of <b>NiL<sub>2</sub></b> by 500 cycles of CV scans in a 1 M KOH representing the (red) 2 <sup>nd</sup> and (black) 500 <sup>th</sup> cycles of the CV scan of <b>NiL<sub>2</sub>-G</b> (a) and <b>NiL<sub>2</sub>-R</b> (b). Inset: Enlarged region of the same voltammograms showing only a 50 μA difference for <b>NiL<sub>2</sub>-G</b> and 70 μA difference for <b>NiL<sub>2</sub>-R</b> in the catalytic current. |
| <b>Figure S11</b> | Chronopotentiometric measurements of <b>NiL<sub>2</sub>-G</b> and <b>NiL<sub>2</sub>-R</b> for 4000 seconds with a current density of 10mA/cm <sup>2</sup> .                                                                                                                                                                                                                                                                            |
| <b>Figure S12</b> | UV-vis absorption spectra of electrode materials dissolved in DMF before and after catalysis, show no obvious change in the curve.                                                                                                                                                                                                                                                                                                      |
| <b>Figure S13</b> | UV-vis absorption spectra of (a) the electrolyte and (b) the centrifuged products of electrolytes dissolved in DMF after catalysis.                                                                                                                                                                                                                                                                                                     |
| <b>Figure S14</b> | PXRD spectra for pure carbon paper, <b>NiL<sub>2</sub>-G</b> before and after catalysis, <b>NiL<sub>2</sub>-R</b> before and after catalysis.                                                                                                                                                                                                                                                                                           |
| <b>Figure S15</b> | Comparison of the Ni 2p high-resolution XPS survey spectrum of <b>NiL<sub>2</sub>-G</b> (right) and <b>NiL<sub>2</sub>-R</b> (left) before and after electrocatalysis; The satellite peaks are indicated by an asterisk (*).                                                                                                                                                                                                            |

## Characterization

**UV-vis absorption spectra** were measured on an Agilent Cary6000i UV-VIS-NIR spectrophotometer.

**Powder X-ray diffraction (PXRD)** spectra were recorded on either a D8 Advance (Bruker) or a Rigaku D/max-III A diffractometer (Cu K $\alpha$ ,  $\lambda = 1.54056 \text{ \AA}$ ) at 293 K. Transmission electron microscopy (TEM) images of the samples were obtained using a FEI Talos F200X transmission electron microscope (200 kV).

**X-ray photoelectron spectroscopy (XPS)** were measured on a Thermo Escalab 250xi X-ray photoelectron spectrometer.

**Density Functional Theory (DFT)** calculation was carried out to study the mechanism of nickel-catalyzed oxygen evolution. All calculations were carried out with the gaussian16,<sup>[1]</sup> B3LYP functional adding GD3BJ empirical dispersion, SDD ESP for Ni and 6-311G(d) basis set for other elements. The relationship between Boltzmann energy distribution and Gibbs free energy distribution:  $G = -kT \ln q^N + NkT V (\partial \ln q / \partial V)_T$ , N represents the number of particles in the system, K represents the Boltzmann constant, T represents the thermodynamic temperature, q represents Partition function of particles, V represents Molecular velocity vector.

### Electrochemical tests:

The electrochemical and electrocatalytic properties of the materials toward OER were comprehensively evaluated with a traditional three-electrode configuration using an electrochemical station (CHI 760E) in 1 M KOH solutions at room temperature. In our case, carbon paper uniformly coated with the electrocatalysts was used as the working electrode, an Ag/AgCl (saturated KCl solution) electrode was used as reference electrode, while the counter electrode was a Pt electrode. The geometric area of the carbon paper was used to normalize the current density. The working electrode was prepared as followed. Base material carbon paper was first ultrasonic for 5 minutes in ethanol, 4M HNO<sub>3</sub> solution and deionized water, respectively. Air dry and ready for use. The **NiL<sub>2</sub>-G** inks were prepared by sonicating 0.5mL acetonitrile, 0.5mL dimethylcarbinol and 3mg **NiL<sub>2</sub>-G** for 2 hours. Then, using pipetting gun to accurately absorbed 50 $\mu$ L as-prepared inks and uniformly loaded onto the treated carbon paper with the area of 0.25cm<sup>2</sup> and dried under environmental condition. After that, protect and immobilize the catalyst by covering the surface with 2 $\mu$ L Nafion (5 % in 2-propanol) solution. The preparation of **NiL<sub>2</sub>-R**

electrode is similar to **NiL<sub>2</sub>-G**. In addition to keep the carbon paper in 140°C oven for 2 hours after loading the **NiL<sub>2</sub>-R** ink onto the carbon paper. The method of preparing CB@NiL<sub>2</sub> ink is almost the same as above but with additional appropriate amount of carbon black (CB) while preparing. The working electrodes underwent 20 cycles of cycle voltammetry until stabilization of current before data collection. Electrochemical impedance spectroscopy (EIS) measurements of the catalysts were conducted at a potential of 1.65 V vs RHE in a frequency range from 10<sup>5</sup> Hz to 1 Hz by using an AC voltage with 5 mV amplitude. Double layer capacitance ( $C_{dl}$ ) of all the as-obtained samples was measured in 1 M KOH solution. Then, five CVs with different scan rates (20, 40, 60, 80, 100 and 120 mV·s<sup>-1</sup>) were obtained in a potential range of 0.1 to 0.2 V, in which no Faradaic process occurs and the current emerges mainly from the double layer capacitance.

**Table S1** Strategy of transition metal complexes as electrocatalysts for OER.

| Strategy                                                                           | Structure                                                                                        | Title                                                                                                                                                                   | Reference                                                   |
|------------------------------------------------------------------------------------|--------------------------------------------------------------------------------------------------|-------------------------------------------------------------------------------------------------------------------------------------------------------------------------|-------------------------------------------------------------|
| Immobilization of metal complexes on micropore materials as heterogeneous catalyst | 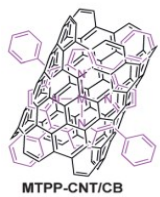<br>MTPP-CNT/CB | Enhanced Catalytic Activity of Cobalt Porphyrin in CO <sub>2</sub> Electroreduction Upon Immobilization on Carbon Materials                                             | <i>Angew. Chem. Int. Ed.</i> , <b>2017</b> , 56, 6468-6472. |
|                                                                                    | 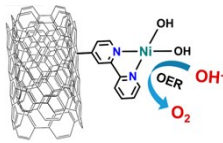                | Functionalized Carbon Nanotubes with Ni(II) Bipyridine Complexes as Efficient Catalysts for the Alkaline Oxygen Evolution Reaction                                      | <i>ACS Catal.</i> , <b>2017</b> , 7, 8033-8041.             |
|                                                                                    | 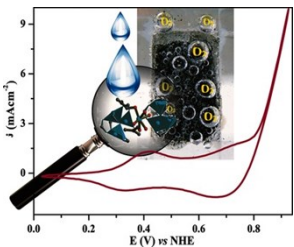               | A Mononuclear Co <sup>II</sup> Coordination Complex Locked in a Confined Space and Acting as an Electrochemical Water-Oxidation Catalyst: A "Ship-in-a-Bottle" Approach | <i>Angew. Chem. Int. Ed.</i> <b>2016</b> , 55, 2425 - 2430  |
| directly fixed on the carbon paper as electrode                                    | 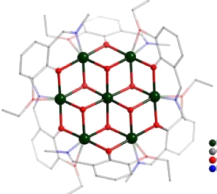              | Heptanuclear Co, Ni and mixed Co-Ni clusters as high-performance water oxidation electrocatalysts                                                                       | <i>Electrochimica Acta</i> , 2017, 249: 343-352.            |
| Concomitant polymorphs of nickel complex as heterogeneous catalysts                | 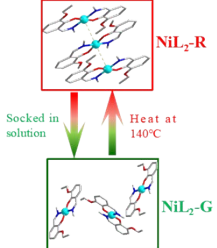              | Superior Performance Water Oxidation of Concomitant Polymorphic Crystals of a Mononuclear Nickel Complex                                                                | This work                                                   |

## Structure comparison and DFT Calculations

**Table S2.** DFT calculation on the coordinating OH<sup>-</sup> mode of NiL<sub>2</sub>-R and NiL<sub>2</sub>-G.

| Model | Ni-Ni distance (Å) | structure                                                                           |
|-------|--------------------|-------------------------------------------------------------------------------------|
| G1    | 6.239              | 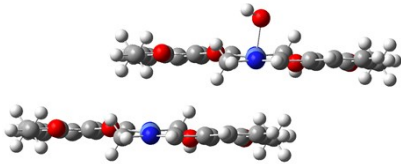  |
| G2    | 9.445              | 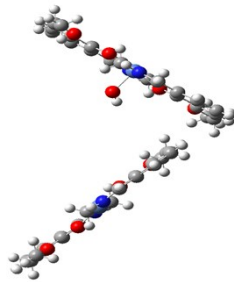  |
| R2    | 3.357              | 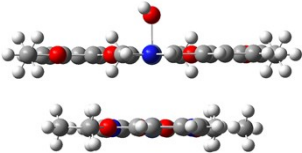 |

**Table S3.** Gibbs free energy of NiL<sub>2</sub> on different steps of OER under U=0 and 1.0 V.

| U=0V     |    |                  |                                      |                                    |                                       |                  |
|----------|----|------------------|--------------------------------------|------------------------------------|---------------------------------------|------------------|
| GFE (eV) |    | NiL <sub>2</sub> | L <sub>2</sub> Ni <sup>III</sup> -OH | L <sub>2</sub> Ni <sup>IV</sup> =O | L <sub>2</sub> Ni <sup>III</sup> -OOH | NiL <sub>2</sub> |
| pH=14    | G1 | 0.000            | 0.842                                | 1.949                              | 1.301                                 | 0.261            |
|          | G2 | 0.000            | 0.883                                | 1.991                              | 1.586                                 | 0.261            |
|          | R1 | 0.000            | 0.855                                | 1.930                              | 1.320                                 | 0.261            |
| U=1V     |    |                  |                                      |                                    |                                       |                  |
| pH=14    | G1 | 0.000            | -0.158                               | -0.051                             | -1.699                                | -3.739           |
|          | G2 | 0.000            | -0.117                               | -0.009                             | -1.414                                | -3.739           |
|          | R1 | 0.000            | -0.145                               | -0.070                             | -1.680                                | -3.739           |

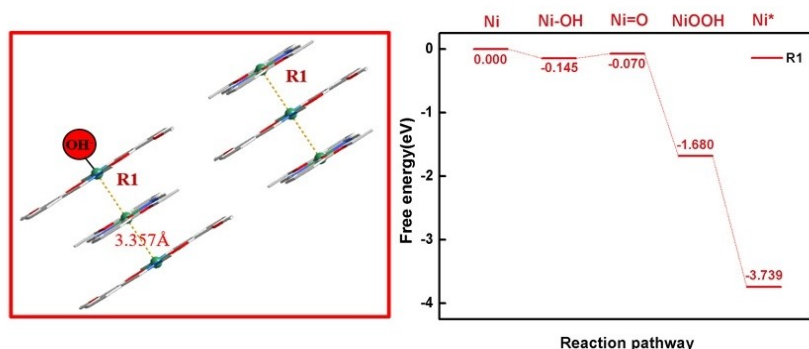

**Figure S1.** Gibbs free energy level diagram of different steps of OER on NiL<sub>2</sub>-R.

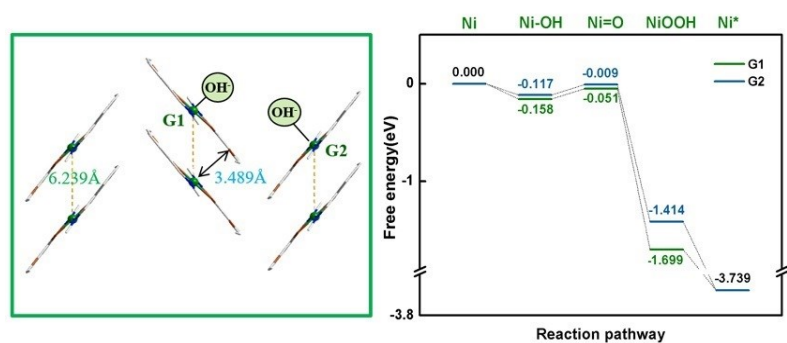

**Figure S2.** Gibbs free energy level diagram of different steps of OER on  $\text{NiL}_2\text{-G}$ .

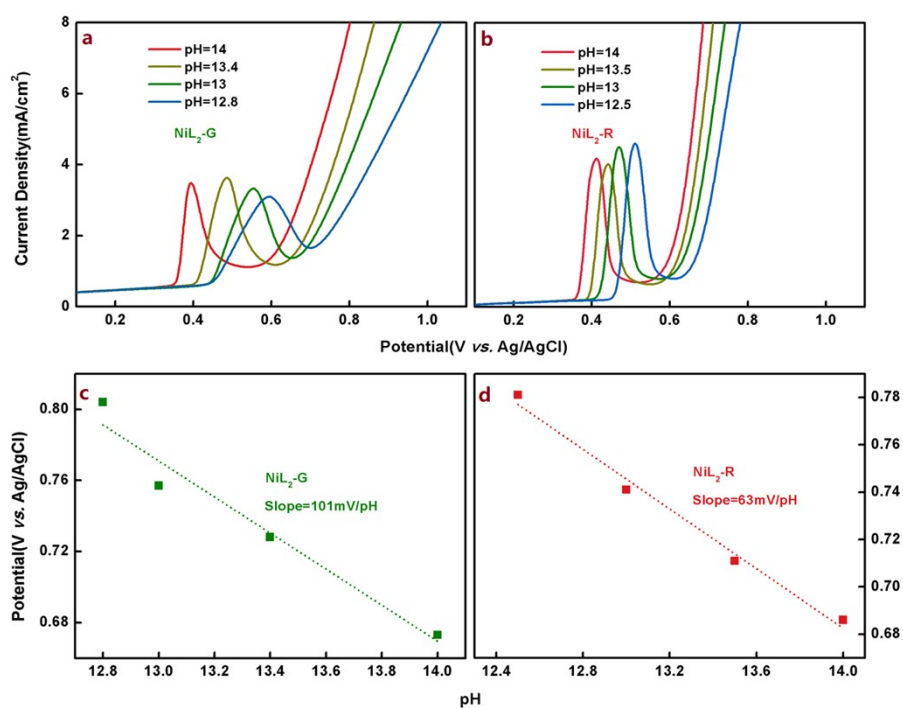

**Figure S3.** Half CVs of (a)  $\text{NiL}_2\text{-G}$  and (b)  $\text{NiL}_2\text{-R}$  electrodes in aqueous solutions with different pH values (the scan rate is 10mV/s). And the dependent potentials of (c)  $\text{NiL}_2\text{-G}$  and (d)  $\text{NiL}_2\text{-R}$  on pH values.

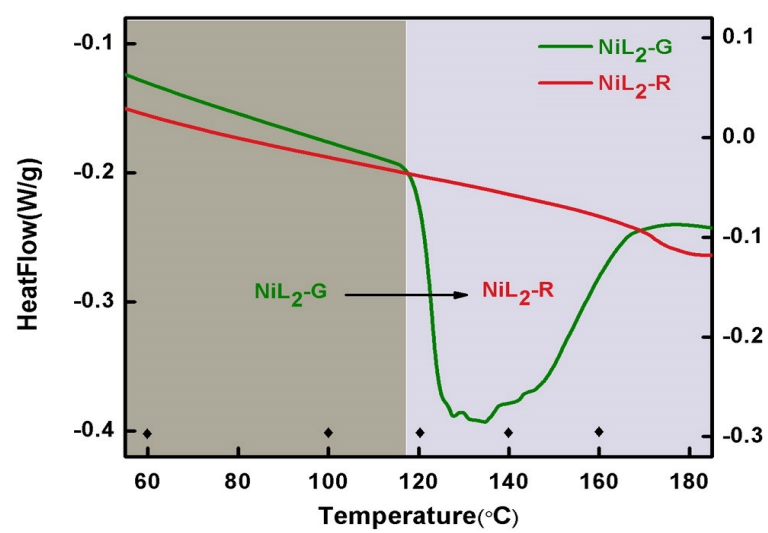

**Figure S4.** DSC curves (Normalized) of NiL<sub>2</sub>-R than that of NiL<sub>2</sub>-G.

## Electrocatalytic oxygen evolution of NiL<sub>2</sub> electrode

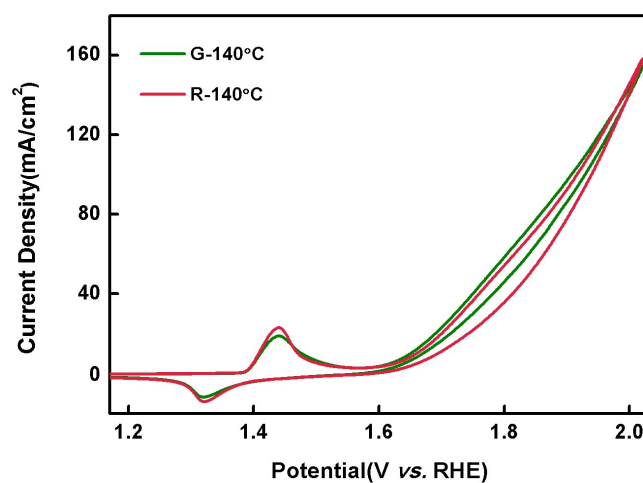

**Figure S5** CVs for NiL<sub>2</sub>-G and NiL<sub>2</sub>-R treated at 140 °C for 2 hours

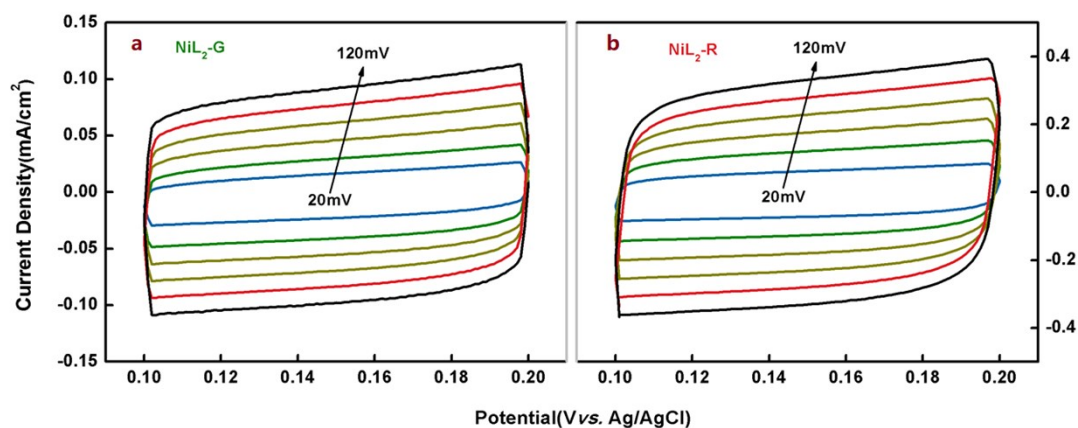

**Figure S6** CVs were measured in the non-faradaic region of 0.10–0.20 V vs. Ag/AgCl with different scan rates, varying from 20 mV s<sup>-1</sup> to 120 mV s<sup>-1</sup>.

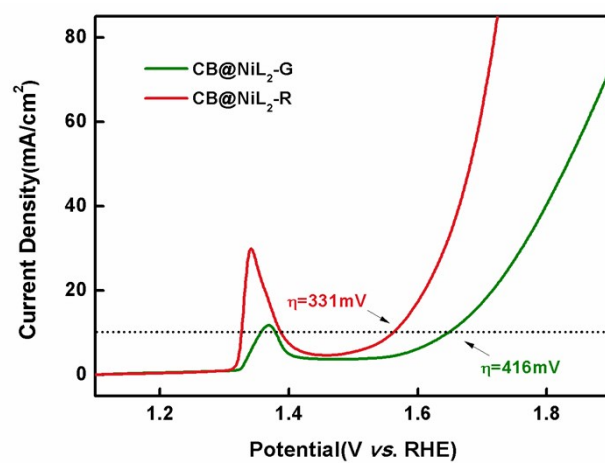

**Figure S7** 85% IR-corrected polarization LSV curves in 1.0 M KOH at a scan rate of 10 mV/s for CB@NiL<sub>2</sub>-G and CB@NiL<sub>2</sub>-R.

**Table S4** Comparison of the parameters in our work with other reported examples.

| <b>Compound</b>                         | <b>Overpotential (mV)<br/>(10 mA/cm<sup>2</sup>)</b> | <b>Tafel plots<br/>(mV/decade)</b> | <b>Reference</b> |
|-----------------------------------------|------------------------------------------------------|------------------------------------|------------------|
| <b>Co<sub>7</sub></b>                   | 410                                                  | 72.9                               | [2]              |
| <b>Ni<sub>7</sub></b>                   | 400                                                  | 55.5                               |                  |
| <b>Ni<sub>x</sub>Co<sub>7-x</sub></b>   | 360                                                  | 53.4                               |                  |
| <b>Ni-POM</b>                           | -                                                    | 168.41                             | [3]              |
| <b>Co-WOC</b>                           | -                                                    | 128                                | [4]              |
| <b>Ni<sub>6</sub>(PET)<sub>12</sub></b> | 430                                                  | 69                                 | [5]              |
| <b>Ni<sup>II</sup>Se<sub>4</sub>@GC</b> | 270                                                  | 89                                 | [6]              |
| <b>Ni-bipy-MWNT</b>                     | 290                                                  | 35                                 | [7]              |
| <b>NiL<sub>2</sub>-G</b>                | 466                                                  | 185                                | Our work         |
| <b>NiL<sub>2</sub>-R</b>                | 339                                                  | 98                                 | Our work         |

## Stability and Physical characterization of the NiL<sub>2</sub>-G and NiL<sub>2</sub>-R electrode

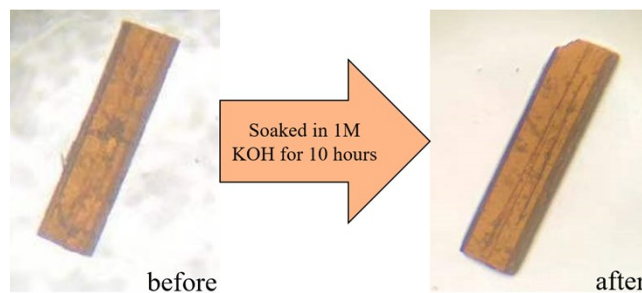

**Figure S8** NiL<sub>2</sub>-R soaked in KOH solution for 10 hours.

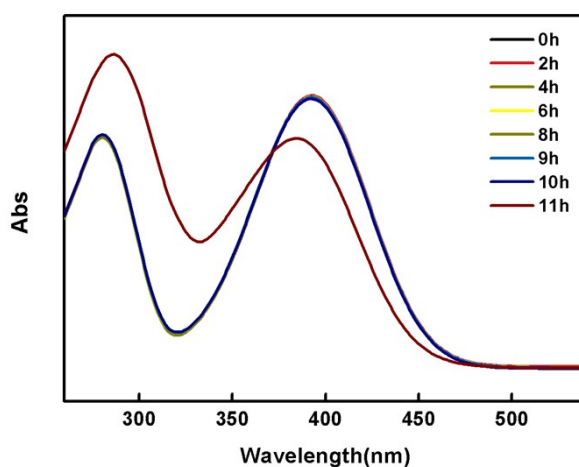

**Figure S9** UV-vis absorption spectra along with the time for NiL<sub>2</sub> (1mg) dissolved in a mixture solvent of DMF (1mL) and KOH solution (9mL).

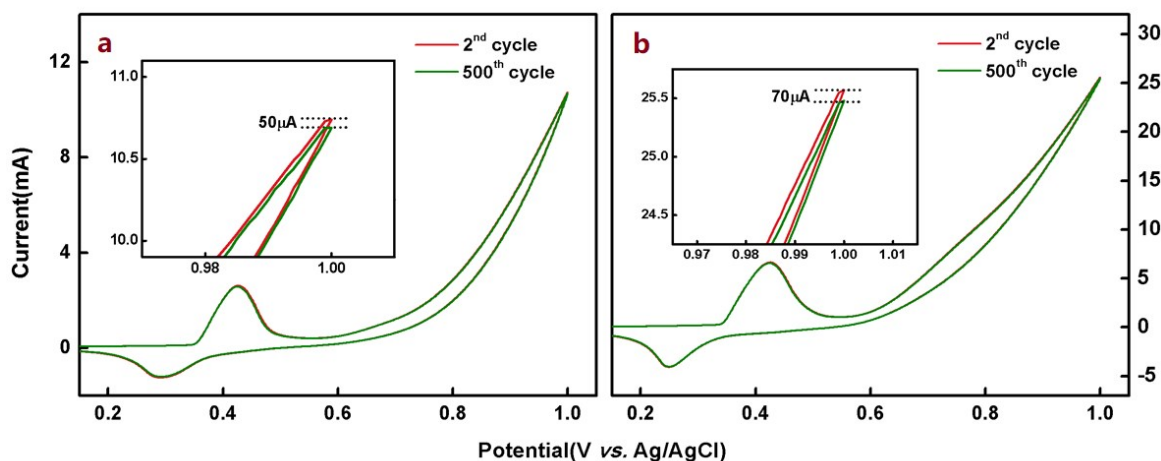

**Figure S10** Stability check of NiL<sub>2</sub> by 500 cycles of CV scans in a 1 M KOH representing the (red) 2<sup>nd</sup> and (black) 500<sup>th</sup> cycles of the CV scan of NiL<sub>2</sub>-G (a) and NiL<sub>2</sub>-R (b). Inset: Enlarged region of the same voltammograms showing only a 50  $\mu$ A difference for NiL<sub>2</sub>-G and 70  $\mu$ A difference for NiL<sub>2</sub>-R in the catalytic current.

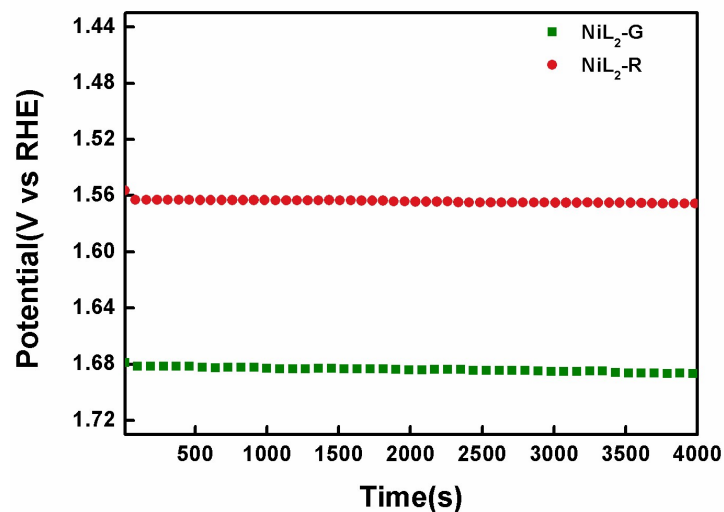

**Figure S11** Chronopotentiometric measurements of  $\text{NiL}_2\text{-G}$  and  $\text{NiL}_2\text{-R}$  for 4000 seconds with a current density of  $10\text{mA}/\text{cm}^2$ .

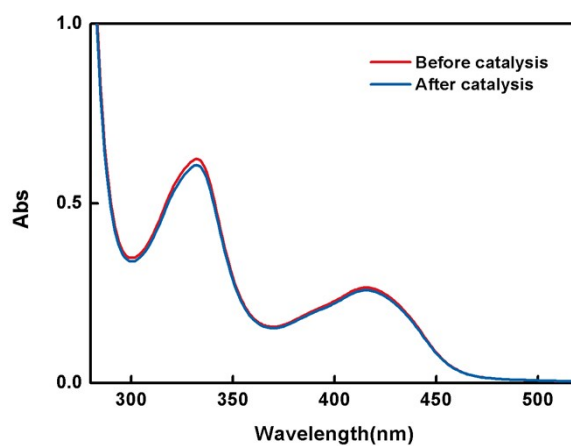

**Figure S12** UV-vis absorption spectra of electrode materials dissolved in DMF before and after catalysis, show no obvious change in the curve.

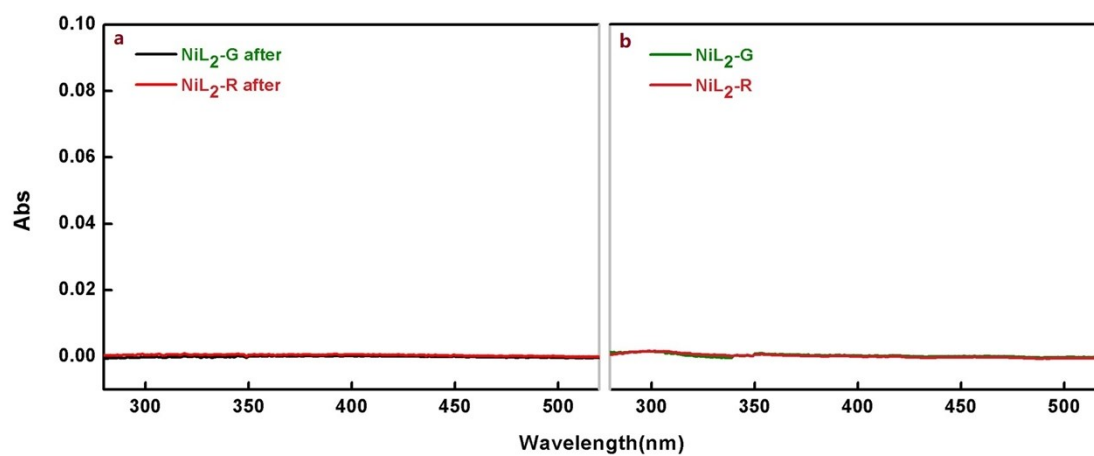

**Figure S13** UV-vis absorption spectra of (a) the electrolyte and (b) the centrifuged products of electrolytes dissolved in DMF after catalysis.

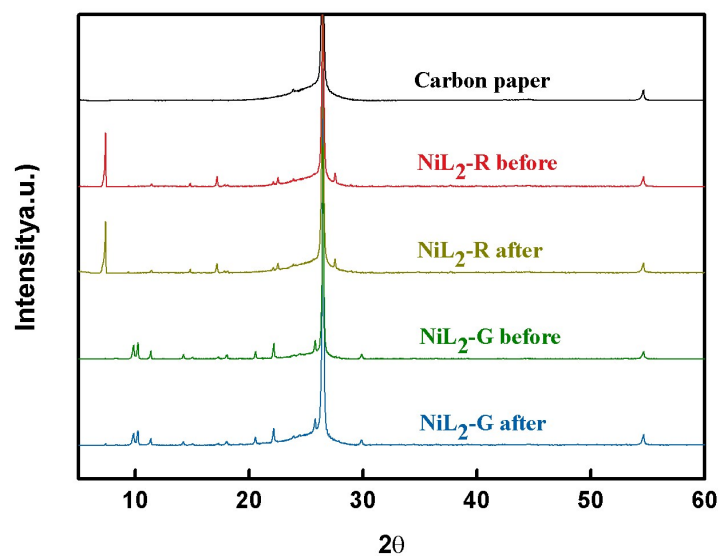

**Figure S14** PXRD spectra for pure carbon paper,  $\text{NiL}_2\text{-G}$  before and after catalysis,  $\text{NiL}_2\text{-R}$  before and after catalysis.

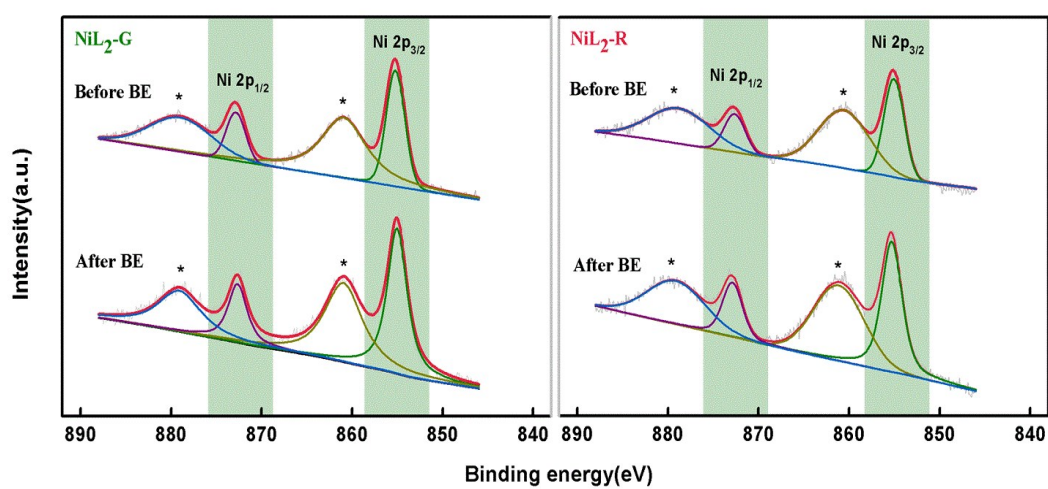

**Figure S15** Comparison of the Ni 2p high-resolution XPS survey spectrum of  $\text{NiL}_2\text{-G}$  (right) and  $\text{NiL}_2\text{-R}$  (left) before and after electrocatalysis; The satellite peaks are indicated by an asterisk (\*).

## Reference

- [1] M. J. Frisch, G. W. Trucks, H. B. Schlegel, G. E. Scuseria, M. A. Robb, J. R. Cheeseman, G. Scalmani, V. Barone, G. A. Petersson, H. Nakatsuji, X. Li, M. Caricato, A. V. Marenich, J. Bloino, B. G. Janesko, R. Gomperts, B. Mennucci, H. P. Hratchian, J. V. Ortiz, A. F. Izmaylov, J. L. Sonnenberg, D. Williams-Young, F. Ding, F. Lipparini, F. Egidi, J. Goings, B. Peng, A. Petrone, T. Henderson, D. Ranasinghe, V. G. Zakrzewski, J. Gao, N. Rega, G. Zheng, W. Liang, M. Hada, M. Ehara, K. Toyota, R. Fukuda, J. Hasegawa, M. Ishida, T. Nakajima, Y. Honda, O. Kitao, H. Nakai, T. Vreven, K. Throssell, J. A. Montgomery, Jr., J. E. Peralta, F. Ogliaro, M. J. Bearpark, J. J. Heyd, E. N. Brothers, K. N. Kudin, V. N. Staroverov, T. A. Keith, R. Kobayashi, J. Normand, K. Raghavachari, A. P. Rendell, J. C. Burant, S. S. Iyengar, J. Tomasi, M. Cossi, J. M. Millam, M. Klene, C. Adamo, R. Cammi, J. W. Ochterski, R. L. Martin, K. Morokuma, O. Farkas, J. B. Foresman, and D. J. Fox, Gaussian, Inc., Wallingford CT, 2016.
- [2] D. Cai, A. Han, P.-Y. Yang, Y.-F. Wu, P. Du, M. Kurmoo, M.-H. Zeng, Heptanuclear Co, Ni and mixed Co-Ni clusters as high-performance water oxidation electrocatalysts, *Electrochim. Acta*, 2017, **249**, 343-352.
- [3] C. Singh, S. Mukhopadhyay, and S. K. Das, Polyoxometalate-Supported Bis(2,2'-bipyridine)mono(aqua)nickel(II) Coordination Complex: an Efficient Electrocatalyst for Water Oxidation, *Inorg Chem.*, 2018, **57**, 6479-6490.
- [4] P. Manna, J. Debgupta, S. Bose, and S. K. Das, A Mononuclear Co<sup>II</sup> Coordination Complex Locked in a Confined Space and Acting as an Electrochemical Water-Oxidation Catalyst: A "Ship-in-a-Bottle" Approach, *Angew. Chem. Int. Ed.*, 2016, **128**, 2471-2476.
- [5] D. R. Kauffman, D. Alfonso, D. N. Tafen, J. Lekse, C. Wang, X. Deng, J. Lee, H. Jang, J. Lee, S. Kumar, C. Matranga, Electrocatalytic Oxygen Evolution with an Atomically Precise Nickel Catalyst, *ACS Catal.*, 2016, **6**, 1225-1234.
- [6] J. Masud, P.-C. Ioannou, N. Levesanos, P. Kyritsis, and M. Nath, A Molecular Ni-complex Containing Tetrahedral Nickel Selenide Core as Highly Efficient Electrocatalyst for Water Oxidation, *ChemSusChem*, 2016, **9**, 3128-3132.
- [7] M. Tavakkoli, M. Nosek, J. Sainio, F. Davodi, T. Kallio, P. M. Joensuu, K. Laasonen, Functionalized Carbon Nanotubes with Ni(II) Bipyridine Complexes as Efficient Catalysts for the Alkaline Oxygen Evolution Reaction, *ACS Catal.*, 2017, **7**, 8033-8041.
